# Supplementary material for: Plasma Phospholipid Fatty Acids and Risk of Atrial Fibrillation: A Mendelian Randomization Study
Source: Nutrients. 2019 Jul 19;11(7):1651. doi: 10.3390/nu11071651 (PMC6683025; doi:10.3390/nu11071651)
Supplement: Supplementary file 1 [file nutrients-11-01651-s001.xlsx]

## Sheet: S Table 1
	Supplementary Table 1. Power calculation for the associations of plasma fatty acids with atrial fibrillation
		% variance explained*				Odds ratio
	Exposure		Outcome	Sample size	Cases	0.7	0.8	0.9	1.1	1.2	1.3
	ALA	1	AF	588190	65446	1	1	0.68	0.67	1	1
	EPA	2.1	AF	588190	65446	1	1	0.93	0.92	1	1
	DPA	11.6	AF	588190	65446	1	1	1	1	1	1
	DHA	0.7	AF	588190	65446	1	0.99	0.53	0.51	0.98	1
	LA	14.5	AF	588190	65446	1	1	1	1	1	1
	AA	21	AF	588190	65446	1	1	1	1	1	1
	POA	2.8	AF	588190	65446	1	1	0.98	0.98	1	1
	OA	1.7	AF	588190	65446	1	1	0.89	0.88	1	1
	PA	0.6	AF	588190	65446	1	0.97	0.47	0.46	0.96	1
	SA	2	AF	588190	65446	1	1	0.93	0.92	1	1
	* % Variance explained by selected SNPs were approximately estimated by using the average values of % vairance explained by SNPs reported in GWAS studies.

## Sheet: S Table 2
	Supplementary Table 2. Sensitivity analyses for the associations of plasma fatty acids with atrial fibrillation
	Fatty acid	Method	OR	LB	UB	P	P for pleiotropy
	DPA	IVW with random-effects	1.01226	0.980964	1.04455	0.447	NA
		Weighted-median	1.01487	0.985401	1.04522	0.326	NA
		MR-Egger	1.05836	0.993972	1.12691	0.077	0.119
	LA	IVW with random-effects	0.966101	0.861702	1.08315	0.554	NA
		Weighted-median	0.979758	0.954182	1.00602	0.13	NA
		MR-Egger	1.04545	0.8898	1.22833	0.589	0.216
		Leave-one-out (rs10740118)*	0.98	0.955	1.006	0.133609	NA
	POA	IVW with random-effects	1.0162	0.889809	1.16054	0.813	NA
		Weighted-median	0.955778	0.877351	1.04122	0.3	NA
		MR-Egger	1.36133	0.883344	2.09796	0.162	0.168
		Leave-one-out (rs603424)*	0.939	0.877	1.006	0.0747654	NA
	SA	IVW with random-effects	1.01023	0.914561	1.11591	0.841	NA
		Weighted-median	1.05973	0.973611	1.15346	0.18	NA
		MR-Egger	6.70906	0.230258	195.482	0.269	0.271
	LB indicates lower bound of 95% confidence interval; OR, odds ratio; UB, upper bound of 95% confidecen interval.

## Sheet: S Table 3
	Supplementary table 3. Related traits of the single-nucleotide polymorphisms associated with plasma fatty acid levels from PhenoScanner search
	FA	SNP	EA	Nearby gene	Related trait	Beta	P	Related trait	Beta	P	Related trait	Beta	P	Related trait	Beta	P	Related trait	Beta	P	Related trait	Beta	P	Related trait	Beta	P	Related trait	Beta	P
	ALA	rs174547	C	FADS1	Triglycerides	0.0469	1.04e-40	Red cell distribution width	-0.04908	6.77e-40	Low density lipoprotein	-0.0505	7.99e-38	Pulse rate	0.03383	8.59e-38	Total cholesterol	-0.0472	1.35e-35	Mean platelet volume	-0.03889	1.14e-24	Height	-0.016	2.1e-08	Wine intake	0.01429	2.62e-08
	EPA	rs3798713	C	ELOVL2	NA	NA	NA	NA	NA	NA	NA	NA	NA	NA	NA	NA	NA	NA	NA	NA	NA	NA	NA	NA	NA	NA	NA	NA
	EPA	rs174538	G	C11orf10	Red cell distribution width	0.05242	1.55e-43	Low density lipoprotein	0.05	1.07e-34	Pulse rate	-0.03183	2.34e-32	Mean platelet volume	0.03953	1.72e-24	Triglycerides	-0.0432	1.47e-19	Height	0.01297	2.63e-12	Wine intake	-0.01446	3.49e-08	NA	NA	NA
	DPA	rs780094	T	GCKR	Triglycerides	0.1102	2.65e-220	Total cholesterol	0.0504	5.28e-41	Alcohol intake frequency	0.04817	1.13e-39	Fat-free mass	-0.02057	4.92e-39	Serum urate	0.075	6.52e-39	Monocyte percentage of white cells	-0.04437	4.02e-34	Pulse rate	0.02764	6.81e-27	Height	-0.01601	1.91e-19
	DPA	rs3734398	C	ELOVL2	NA	NA	NA	NA	NA	NA	NA	NA	NA	NA	NA	NA	NA	NA	NA	NA	NA	NA	NA	NA	NA	NA	NA	NA
	DPA	rs174547	T	FADS1	Triglycerides	0.0469	1.04e-40	Red cell distribution width	-0.04908	6.77e-40	Low density lipoprotein	-0.0505	7.99e-38	Pulse rate	0.03383	8.59e-38	Total cholesterol	-0.0472	1.35e-35	Mean platelet volume	-0.03889	1.14e-24	Height	-0.016	2.1e-08	Wine intake	0.01429	2.62e-08
	DHA	rs2236212	G	ELOVL2	NA	NA	NA	NA	NA	NA	NA	NA	NA	NA	NA	NA	NA	NA	NA	NA	NA	NA	NA	NA	NA	NA	NA	NA
	LA	rs10740118	G	JMJD1C	Mean platelet volume	0.1322	7.26e-286	Platelet count	-0.07649	2.51e-95	Triglycerides	0.0302	1.81e-11	Average weekly beer plus cider intake	0.01214	2.28e-09	Body mass index	0.01395	1.05e-08	Years of educational attainment	-0.014	1.36e-08	Height	-0.009465	6.49e-08	Sodium in urine	0.01237	2.52e-07
	LA	rs174547	C	FADS1	Triglycerides	0.0469	1.04e-40	Red cell distribution width	-0.04908	6.77e-40	Low density lipoprotein	-0.0505	7.99e-38	Pulse rate	0.03383	8.59e-38	Total cholesterol	-0.0472	1.35e-35	Mean platelet volume	-0.03889	1.14e-24	Height	-0.016	2.1e-08	Wine intake	0.01429	2.62e-08
	LA	rs16966952	G	NTAN1	Whole body fat-free mass	0.01113	3.67e-11	Basal metabolic rate	0.01142	9.52e-11	Height	0.01203	2e-10	Weight	0.01282	3.5e-08	Leg fat-free mass left	0.0111	2.35e-10	NA	NA	NA	NA	NA	NA	NA	NA	NA
	AA	rs174547	T	FADS1	Triglycerides	0.0469	1.04e-40	Red cell distribution width	-0.04908	6.77e-40	Low density lipoprotein	-0.0505	7.99e-38	Pulse rate	0.03383	8.59e-38	Total cholesterol	-0.0472	1.35e-35	Mean platelet volume	-0.03889	1.14e-24	Height	-0.016	2.1e-08	Wine intake	0.01429	2.62e-08
	AA	rs16966952	G	NTAN1	Whole body fat-free mass	0.01113	3.67e-11	Basal metabolic rate	0.01142	9.52e-11	Height	0.01203	2e-10	Weight	0.01282	3.5e-08	Leg fat-free mass left	0.0111	2.35e-10	NA	NA	NA	NA	NA	NA	NA	NA	NA
	POA	rs780093	T	GCKR	Triglycerides	0.1102	2.65e-220	Total cholesterol	0.0504	5.28e-41	Alcohol intake frequency	0.04817	1.13e-39	Fat-free mass	-0.02057	4.92e-39	Serum urate	0.075	6.52e-39	Monocyte percentage of white cells	-0.04437	4.02e-34	Pulse rate	0.02764	6.81e-27	Height	-0.01601	1.91e-19
	POA	rs6722456	G	RN7SKP93	NA	NA	NA	NA	NA	NA	NA	NA	NA	NA	NA	NA	NA	NA	NA	NA	NA	NA	NA	NA	NA	NA	NA	NA
	POA	rs603424	G	SCD/PKD2L1	Blood metabolite ratios	-0.054	1e-115	Mean platelet volume	0.05547	4.56e-31	Heel bone mineral density	0.02881	3.77e-12	Impedance of arm left	0.01585	4.35e-12	Self-reported high cholesterol	-0.005779	5.28e-08	NA	NA	NA	NA	NA	NA	NA	NA	NA
	POA	rs11190604	G	HIF1AN	Leg predicted mass left	-0.01268	4.16e-11	Whole body fat-free mass	-0.01143	7.48e-10	Height	-0.01276	9.6e-10	Basal metabolic rate	-0.01187	1.09e-09	NA	NA	NA	NA	NA	NA	NA	NA	NA	NA	NA	NA
	POA	rs102275	C	FADS1/2	Red cell distribution width	-0.04961	4.49e-41	Triglycerides	0.0459	4.27e-40	Low density lipoprotein	-0.0512	7.61e-40	Pulse rate	0.03318	9.8e-37	High density lipoprotein	-0.0391	6.4e-28	Triglycerides	0.0478	1.58e-23	Fasting glucose	-0.019	4.97e-17	Height	-0.01214	1.89e-11
	OA	rs102275	C	FADS1/2	Red cell distribution width	-0.04961	4.49e-41	Triglycerides	0.0459	4.27e-40	Low density lipoprotein	-0.0512	7.61e-40	Pulse rate	0.03318	9.8e-37	High density lipoprotein	-0.0391	6.4e-28	Triglycerides	0.0478	1.58e-23	Fasting glucose	-0.019	4.97e-17	Height	-0.01214	1.89e-11
	PA	rs2391388	C	ALG14	NA	NA	NA	NA	NA	NA	NA	NA	NA	NA	NA	NA	NA	NA	NA	NA	NA	NA	NA	NA	NA	NA	NA	NA
	SA	rs6675668	G	ALG14	NA	NA	NA	NA	NA	NA	NA	NA	NA	NA	NA	NA	NA	NA	NA	NA	NA	NA	NA	NA	NA	NA	NA
	SA	rs11119805	T	LPGAT1	NA	NA	NA	NA	NA	NA	NA	NA	NA	NA	NA	NA	NA	NA	NA	NA	NA	NA	NA	NA	NA	NA	NA
	SA	rs102275	T	FADS1/2	Red cell distribution width	-0.04961	4.49e-41	Triglycerides	0.0459	4.27e-40	Low density lipoprotein	-0.0512	7.61e-40	Pulse rate	0.03318	9.8e-37	High density lipoprotein	-0.0391	6.4e-28	Triglycerides	0.0478	1.58e-23	Fasting glucose	-0.019	4.97e-17	Height	-0.01214	1.89e-11
	EA indicates effect allele; FAs, fatty acids; NA, not available; SNP, single-nucleotide polymorphisms. Web of PhenoScanner V2:http://www.phenoscanner.medschl.cam.ac.uk/
